# Supplementary material for: ProQ3: Improved model quality assessments using Rosetta energy terms
Source: Springer Nature journal article supplement (doi:10.1038/srep33509), 2016-10-04
Supplement: 41598_2016_BFsrep33509_MOESM1_ESM.pdf [file 41598_2016_BFsrep33509_MOESM1_ESM.pdf]

# Supporting material for: ProQ3: Improved model quality assessments using Rosetta energy terms

Karolis Uziela, Nanjiang Shu, Björn Wallner and Arne Elofsson

Table S1: Wilcoxon test p-values for significance of differences in per target correlations between ProQ3 and other methods. P-values lower than 0.05 are marked in bold.

|                      | ProQ2 | ProQ-RosFA | ProQ-RosCen  | QMEAN           | QPROB        | SMOQ            | DOPE            | DDFIRE          |
|----------------------|-------|------------|--------------|-----------------|--------------|-----------------|-----------------|-----------------|
| <b>PROQ3, CASP11</b> | 0.485 | 0.498      | 0.153        | <b>3.91E-04</b> | <b>0.018</b> | <b>3.35E-09</b> | <b>8.25E-13</b> | <b>2.81E-09</b> |
| <b>PROQ3, CAMEO</b>  | 0.12  | 0.232      | <b>0.011</b> | <b>9.13E-12</b> | <b>0.028</b> | <b>5.18E-46</b> | 0.104           | <b>0.019</b>    |

Table S2: Method performance on CASP11 free modelling targets (15 targets). Only targets that have all domains classified as free modeling domains according to the official CASP classification are considered.

|                   | Global whole data set correlation | Global per target correlation | Local whole data set correlation | Local per model correlation | Average first ranked GDT_TS |
|-------------------|-----------------------------------|-------------------------------|----------------------------------|-----------------------------|-----------------------------|
| <b>ProQ3</b>      | 0.520                             | 0.492                         | 0.334                            | 0.285                       | 21.9                        |
| <b>ProQRosFA</b>  | 0.475                             | 0.471                         | 0.305                            | 0.272                       | 21.9                        |
| <b>ProQRosCen</b> | 0.470                             | 0.482                         | 0.279                            | 0.206                       | 20.5                        |
| <b>ProQ2</b>      | 0.507                             | 0.506                         | 0.298                            | 0.244                       | 21.9                        |
| <b>QMEAN</b>      | 0.446                             | 0.474                         | 0.231                            | 0.206                       | 21.8                        |
| <b>QPROB</b>      | 0.420                             | 0.514                         | -                                | -                           | 22.3                        |
| <b>SMOQ</b>       | 0.238                             | 0.465                         | 0.165                            | 0.157                       | 21.4                        |
| <b>DOPE</b>       | 0.224                             | 0.371                         | 0.037                            | 0.082                       | 22.5                        |
| <b>DDFIRE</b>     | -0.366                            | 0.383                         | -                                | -                           | 17.7                        |

Table S3: **Method performance on CASP11 template-based targets (52 targets)**. Only targets that have all domains classified as template-based domains according to the official CASP classification are considered.

|                   | <b>Global whole data set correlation</b> | <b>Global per target correlation</b> | <b>Local whole data set correlation</b> | <b>Local per model correlation</b> | <b>Average first ranked GDT_TS</b> |
|-------------------|------------------------------------------|--------------------------------------|-----------------------------------------|------------------------------------|------------------------------------|
| <b>ProQ3</b>      | 0.804                                    | 0.581                                | 0.702                                   | 0.548                              | 62.7                               |
| <b>ProQRosFA</b>  | 0.775                                    | 0.564                                | 0.674                                   | 0.530                              | 61.7                               |
| <b>ProQRosCen</b> | 0.732                                    | 0.529                                | 0.638                                   | 0.461                              | 59.3                               |
| <b>ProQ2</b>      | 0.794                                    | 0.558                                | 0.688                                   | 0.523                              | 62.3                               |
| <b>QMEAN</b>      | 0.689                                    | 0.479                                | 0.580                                   | 0.468                              | 59.3                               |
| <b>QPROB</b>      | 0.717                                    | 0.483                                | -                                       | -                                  | 60.1                               |
| <b>SMOQ</b>       | 0.501                                    | 0.329                                | 0.394                                   | 0.295                              | 57                                 |
| <b>DOPE</b>       | 0.491                                    | 0.305                                | 0.211                                   | 0.189                              | 59.5                               |
| <b>DDFIRE</b>     | 0.306                                    | 0.369                                | -                                       | -                                  | 57.2                               |

Table S4: **ProQ3 performance with and without side-chain repacking**.

|                                | <b>Global whole data set correlation</b> | <b>Global per target correlation</b> | <b>Local whole data set correlation</b> | <b>Local per model correlation</b> | <b>Average first ranked GDT_TS</b> |
|--------------------------------|------------------------------------------|--------------------------------------|-----------------------------------------|------------------------------------|------------------------------------|
| <b>ProQ3-no-repack, CASP11</b> | 0.849                                    | 0.467                                | 0.730                                   | 0.471                              | 51.2                               |
| <b>ProQ3-repack, CASP11</b>    | 0.865                                    | 0.548                                | 0.739                                   | 0.476                              | 51.5                               |
| <b>ProQ3-no-repack, CAMEO</b>  | 0.725                                    | 0.322                                | 0.600                                   | 0.503                              | 69.6                               |
| <b>ProQ3-repack, CAMEO</b>     | 0.737                                    | 0.529                                | 0.615                                   | 0.511                              | 70.9                               |

Table S5: Average GDT\_TS1 for each method before and after re-ranking for all prediction groups. Targets column denotes on how many targets each group was evaluated. Groups that submitted only 1 model per target were excluded.

|                     | Original<br>GDT_TS1 | ProQ3<br>GDT_TS1 | ProQ2<br>GDT_TS1 | Optimal<br>GDT_TS1 | Targets |
|---------------------|---------------------|------------------|------------------|--------------------|---------|
| QUARK               | 51.0                | 50.7             | 50.8             | 53.2               | 83      |
| Zhang-Server        | 50.7                | 51.5             | 50.7             | 53.4               | 83      |
| nns                 | 49.7                | 49.7             | 49.8             | 51.7               | 83      |
| myprotein-me        | 49.4                | 50.0             | 49.6             | 52.6               | 83      |
| BAKER-ROSETTASERVER | 49.2                | 50.8             | 50.7             | 53.2               | 83      |
| MULTICOM-CONSTRUCT  | 48.9                | 48.4             | 48.5             | 50.5               | 83      |
| MULTICOM-CLUSTER    | 48.8                | 49.3             | 49.2             | 50.2               | 83      |
| MULTICOM-NOVEL      | 47.9                | 48.2             | 48.1             | 50.7               | 83      |
| RaptorX             | 47.5                | 47.8             | 47.7             | 48.5               | 82      |
| HHPredA             | 47.2                | 47.2             | 47.2             | 47.2               | 83      |
| HHPredX             | 47.1                | 47.1             | 47.1             | 47.1               | 83      |
| FALCON_MANUAL_X     | 47.0                | 47.2             | 47.3             | 48.1               | 83      |
| TASSER-VMT          | 47.0                | 47.6             | 47.4             | 49.7               | 83      |
| FALCON_MANUAL       | 47.0                | 47.0             | 47.2             | 48.2               | 83      |
| FALCON_TOPO         | 46.9                | 47.0             | 46.9             | 48.0               | 83      |
| FALCON_EnvFold      | 46.9                | 47.3             | 47.3             | 48.4               | 83      |
| Pcons-net           | 46.3                | 46.8             | 46.2             | 48.4               | 83      |
| FFAS-3D             | 46.3                | 46.8             | 46.7             | 47.7               | 83      |
| MULTICOM-REFINE     | 46.2                | 46.0             | 46.1             | 47.5               | 83      |
| raghavagps-tsppred  | 45.5                | 44.6             | 45.2             | 46.0               | 83      |
| PhyreX              | 45.4                | 45.8             | 45.8             | 46.6               | 83      |
| BioSerf             | 45.4                | 45.3             | 45.1             | 48.0               | 80      |
| Seok-server         | 44.7                | 44.7             | 44.7             | 44.9               | 83      |
| chuo-fams-server    | 43.5                | 43.7             | 44.0             | 45.3               | 83      |
| FLOUDAS_SERVER      | 42.8                | 42.7             | 42.7             | 44.4               | 81      |
| FFAS03              | 42.6                | 43.0             | 43.0             | 43.9               | 83      |
| eThread             | 42.5                | 43.4             | 42.9             | 46.0               | 83      |
| slbio               | 42.3                | 43.0             | 42.8             | 45.1               | 82      |
| Distill             | 42.2                | 42.4             | 42.4             | 44.5               | 81      |
| 3D-Jigsaw-V5_1      | 42.1                | 42.2             | 42.2             | 43.9               | 82      |
| STRINGS             | 42.0                | 43.6             | 42.8             | 46.3               | 81      |
| ZHOU-SPARKS-X       | 41.7                | 42.2             | 42.3             | 44.9               | 83      |
| Atome2_CBS          | 41.7                | 43.6             | 43.7             | 46.3               | 82      |
| RBO_Aleph           | 41.4                | 42.0             | 41.9             | 44.3               | 81      |
| MUFOLD-Server       | 41.2                | 41.2             | 41.2             | 42.5               | 83      |
| Alpha-Gelly-Server  | 40.7                | 44.1             | 44.0             | 45.6               | 83      |
| BhageerathH         | 38.7                | 40.7             | 40.6             | 41.7               | 83      |
| FUSION              | 34.1                | 35.0             | 34.7             | 37.3               | 83      |
| BioShell-server     | 32.9                | 34.3             | 34.6             | 36.9               | 81      |
| SAM-T08-server      | 29.0                | 28.6             | 28.7             | 45.7               | 54      |
| PSF                 | 20.3                | 20.3             | 20.3             | 33.1               | 51      |
| MATRIX              | 18.7                | 18.7             | 18.5             | 30.7               | 52      |
| IntFOLD3            | 15.3                | 15.3             | 15.3             | 35.4               | 36      |
| RaptorX-FM          | 8.0                 | 8.3              | 8.4              | 23.2               | 32      |
